# Supplementary material for: Pyrosequencing-Based Assays for Rapid Detection of HER2 and HER3 Mutations in Clinical Samples Uncover an E332E Mutation Affecting HER3 in Retroperitoneal Leiomyosarcoma
Source: Int J Mol Sci. 2015 Aug 17;16(8):19447–57. doi: 10.3390/ijms160819447 (PMC4581306; doi:10.3390/ijms160819447)
Supplement: Supplementary file 1 [file ijms-16-19447-s001.pdf]

## Supplementary Information

### A HER2

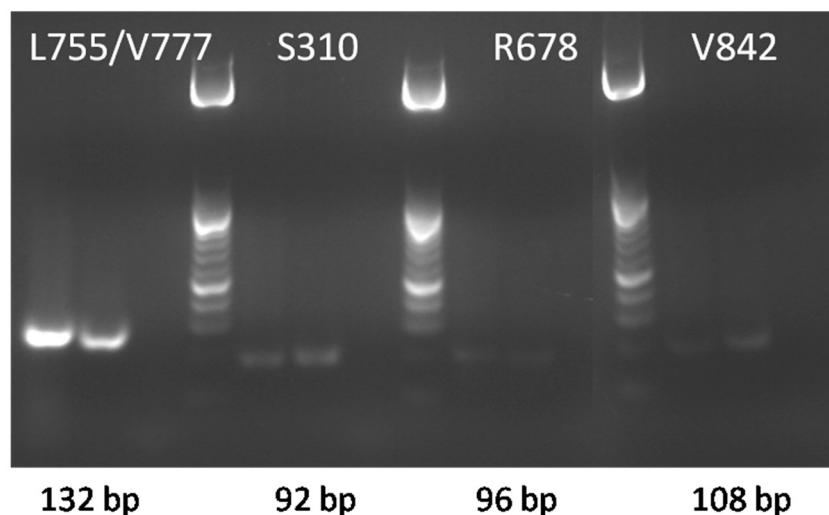

### B HER3

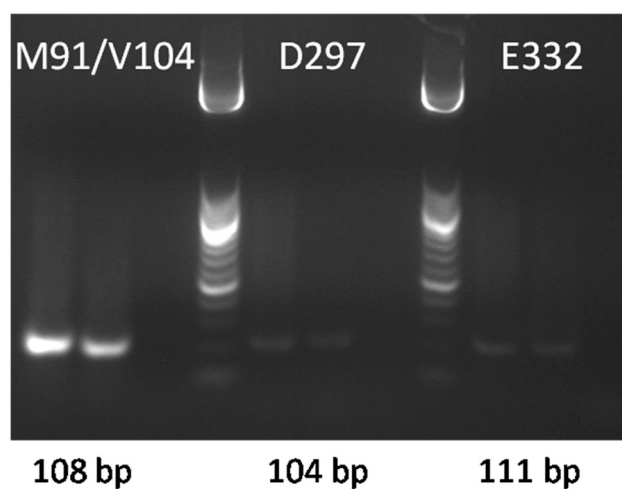

**Figure S1.** 2% agarose gel electrophoresis shows PCR success and primer specificity. (A,B) Molecular Weight Marker XIII (Roche) lanes separate different PCR assay areas. Lanes within each PCR assay show loaded PCR products from tumor sample, MSA (C+), and NTC, respectively. Each PCR assay shows a unique PCR product corresponding to the expected size. NTC lanes showing undetected signal indicate the absence of primer-dimer formation. Results obtained within all lanes reveal optimally adjusted physic and chemical PCR conditions. (A) HER2 PCR amplification assays; (B) HER3 PCR amplification assays. Abbreviations: C+: positive control. NTC: Non-Template Control.
